# Supplementary material for: Canopy Homolog 2 as a Novel Molecular Target in Hepatocarcinogenesis
Source: MDPI journal article supplement (doi:10.3390/cancers13143613), 2021-07-19
Supplement: s1 [file s1]

## Supplementary Materials: Canopy Homolog 2 as a Novel Molecular Target in Hepatocarcinogenesis

Anna Kakehashi, Shugo Suzuki, Masayuki Shiota, Nina Raymo, Min Gi, Taro Tachibana, Vasily Stefanov and Hideki Wanibuchi

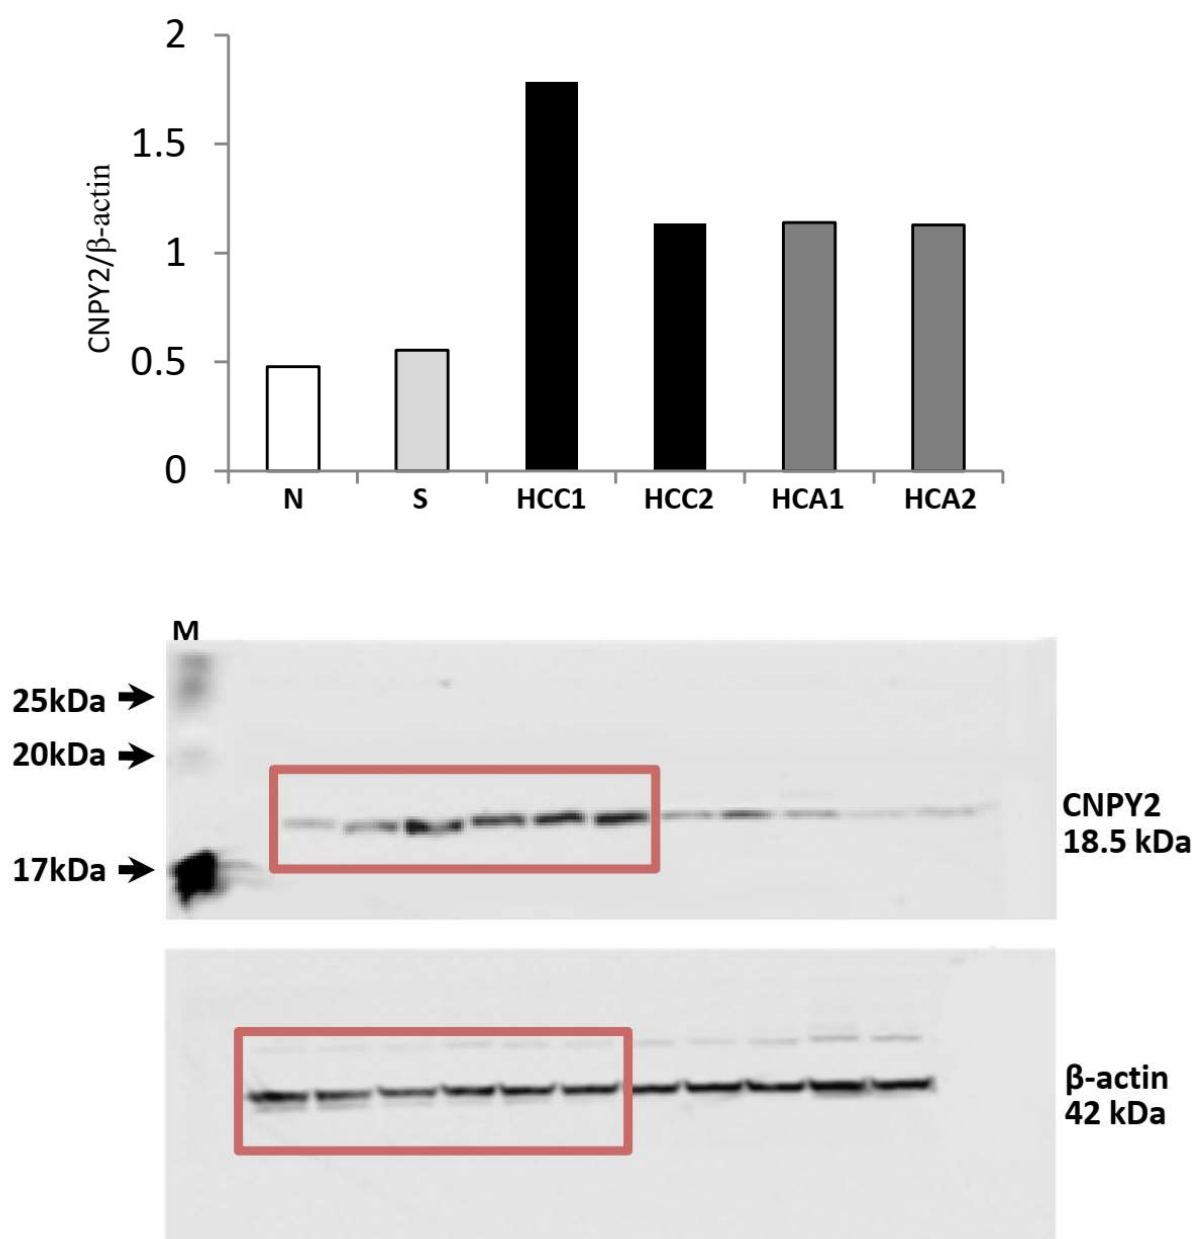

**Figure S1.** Overexpression of CNPY2 in HCCs of DEN-treated C57Bl/6J mice detected by Western blot analysis. Note very low expression of CNPY2 in non-treated mice livers, small increase in non-healthy surrounding livers and high expression in HCCs. N: normal liver; S: surrounding liver.

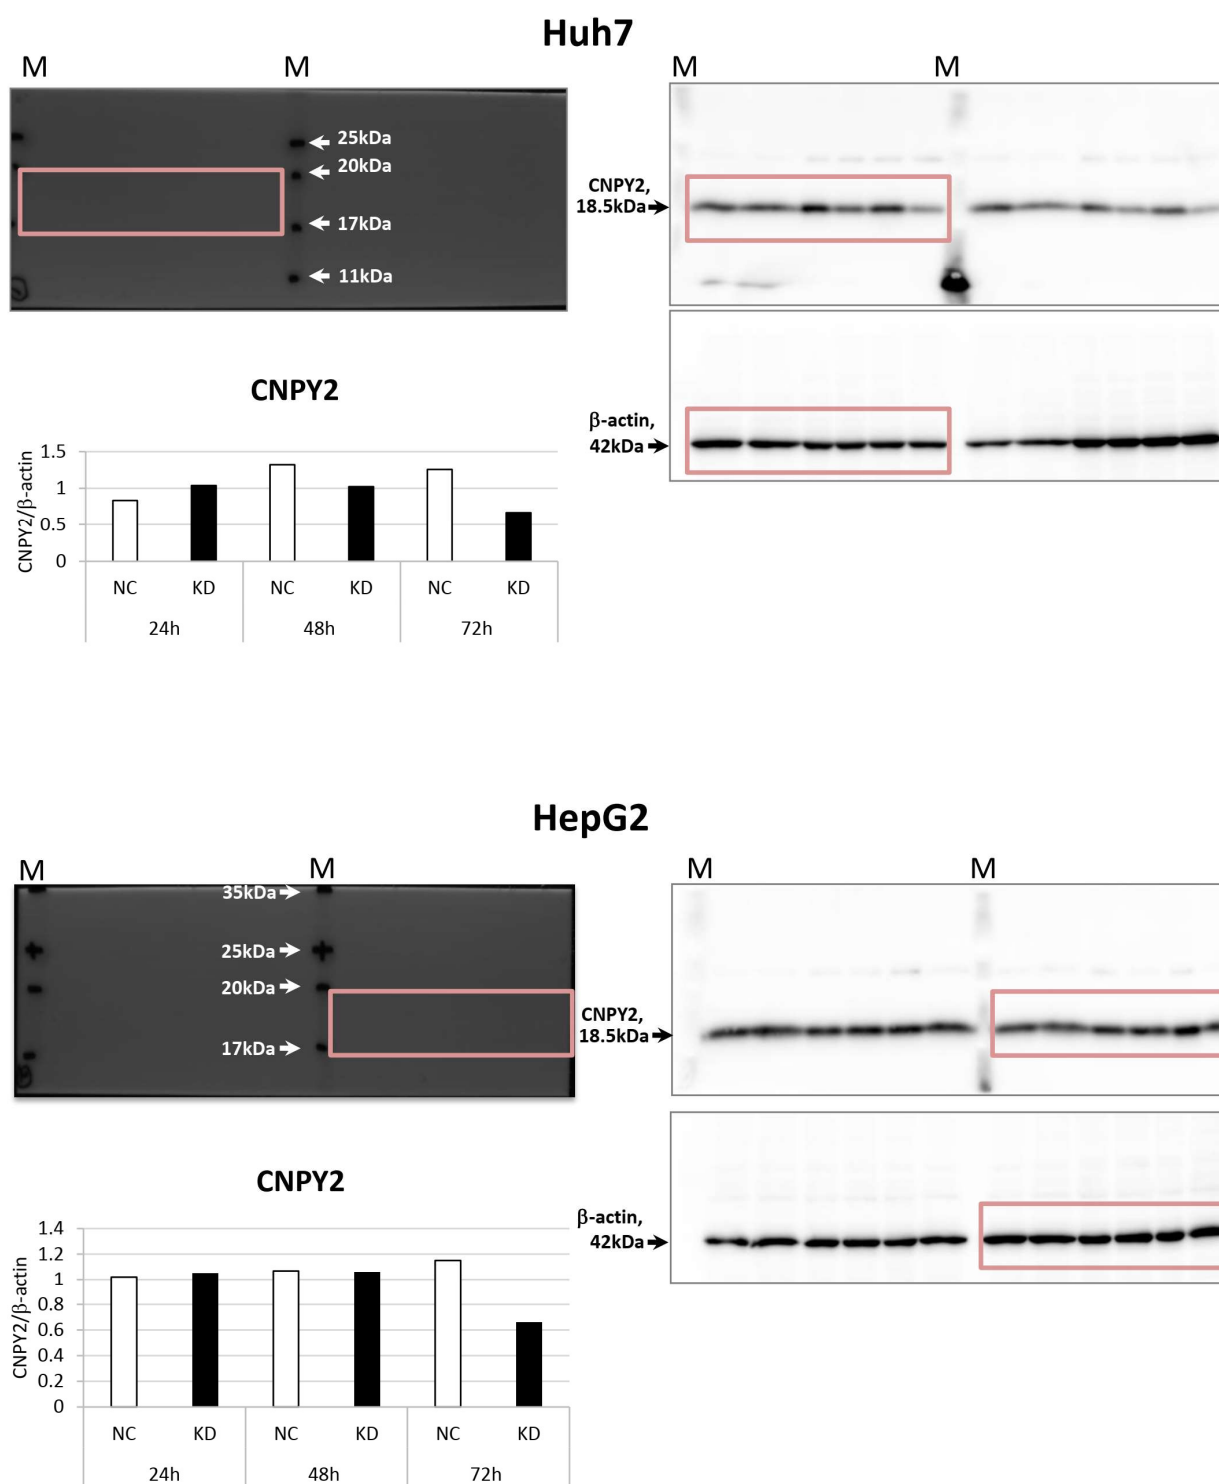

**Figure S2.** CNPY2 knockdown in Huh7 and HepG2 cells detected by Western Blot analysis.

## Liver cancer cell

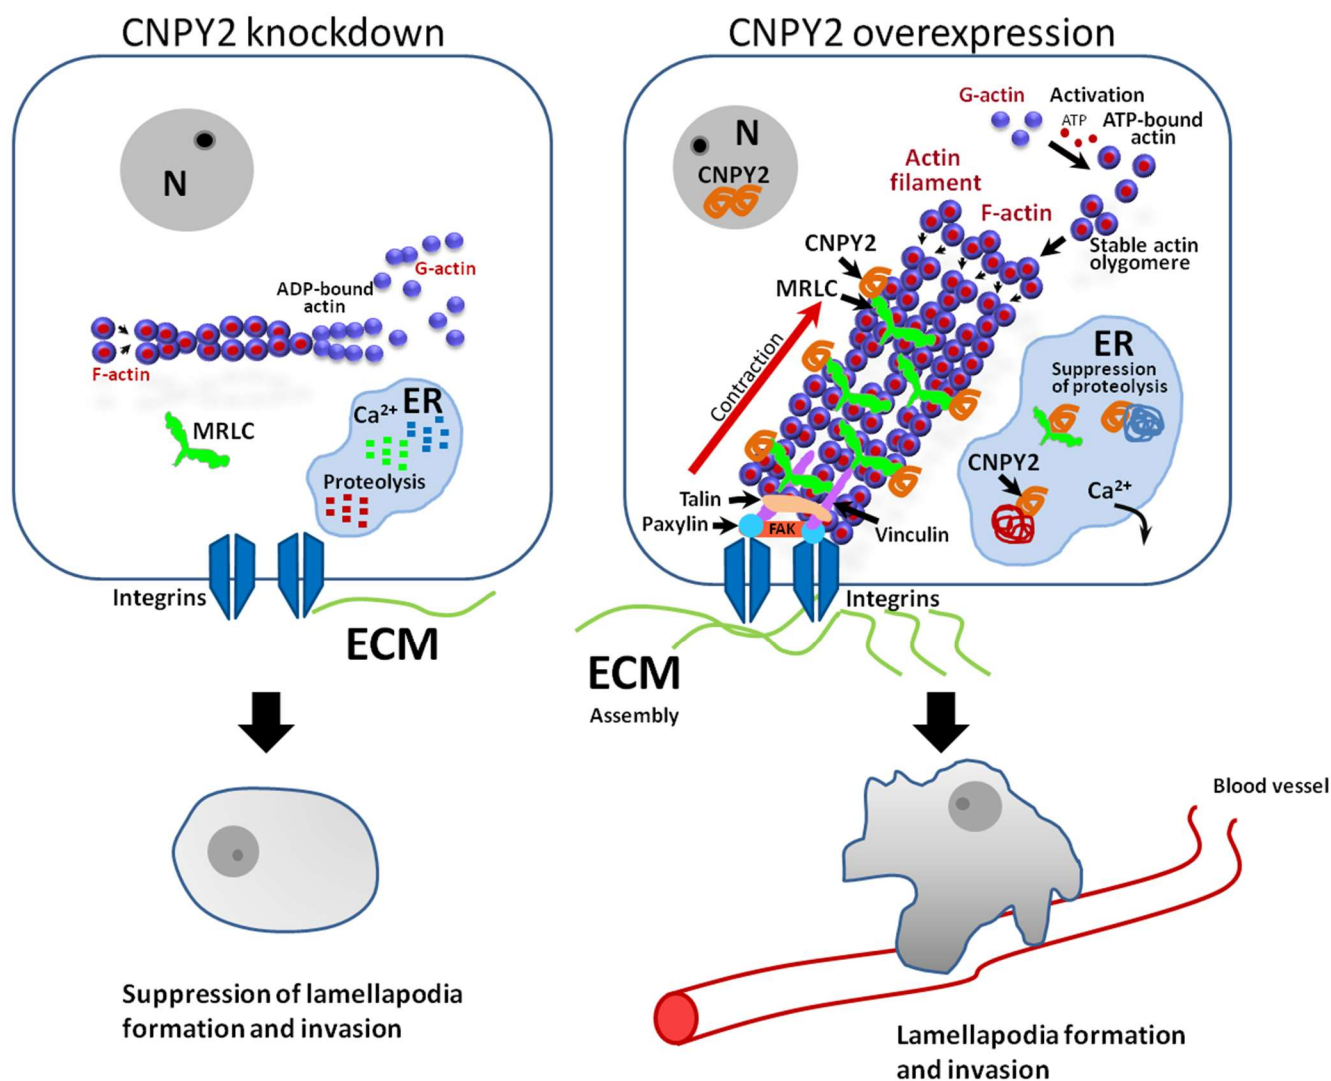

**Figure S3.** A proposed effect of CNPY2 knockdown on ER stress, actomyosin-ECM system and invasion activity of liver cancer cells. N: nuclear; ER: endoplasmic reticulum, ECM: extracellular matrix; G-actin, globular actin; F-actin, filamentous actin; MRLC, myosin regulatory light chain.

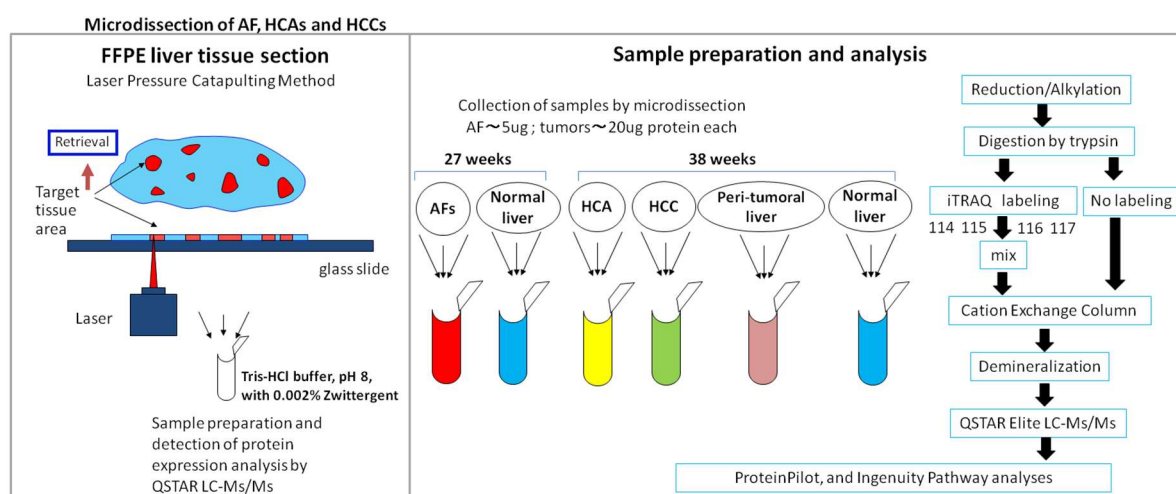

**Figure S4.** Developed method for sensitive proteome analysis in laser-microdissected samples of altered foci and liver tumors of DEN-treated and control C57Bl/6J mice.

**Table S1.** Up-stream regulator analysis in CNPY2kn Huh7 cell line (IPA).

| Upstream Regulator | Molecule Type           | Predicted Activation State | Activation z-Score | p-Value of Overlap | Target Molecules in Dataset                                                                                                                                                    |
|--------------------|-------------------------|----------------------------|--------------------|--------------------|--------------------------------------------------------------------------------------------------------------------------------------------------------------------------------|
| TP53               | transcription regulator | Activated                  | 2.019              | 2E-09              | ATP5MC1,CALU,CLTA, COL3A1,COMT, DDX39A,EPHX1,G6PD,GAPDH,H2AX,HS P90AA1,HSPA5, IDH2,KRT8,LDHA,M DH2,MYH9,PFN1,PK M, PRDX3,RPS12,SOD2, TALDO1,TIMM44,T MED7, TRPV1,TTN,UBC,UG DH |
| SP1                | transcription regulator | Inhibited                  | -2.392             | 0.01               | ATP5F1B,BACE2,HS PA5,KRT19,PKM,SO D2,UBC,UGDH                                                                                                                                  |
| Ins1               | other                   | Inhibited                  | -2.377             | 0.0058             | ALB,G6PD,GAPDH, LDHA,SOD2,TF                                                                                                                                                   |
| CEBPA              | transcription regulator | Inhibited                  | -2.19              | 0.0317             | AKR1C1/AKR1C2,A LB,EPHX1,GAPDH, HSPA5, SOD2 AKR1C1/AKR1C2,A LDOA,COL3A1,EPH X1,G6PD,HSP90AA1, HSPA9,HYOU1,LM NA,PRDX1,PREP,S10 0P,SOD2, TALDO1,TXN,UBC, UGDH                   |
| NFE2L2             | transcription regulator | Inhibited                  | -2.112             | 1E-10              | AFP,AHSG,AKR1C1/ AKR1C2,ALB,CBX3, CLTA, CUX2,EPHX1,G6PD, GAPDH,HSPA5,KH                                                                                                        |
| HNF4A              | transcription regulator | Inhibited                  | -2.042             | 0.0003             |                                                                                                                                                                                |

|        |                                   |           |        |        |                                                                                                                                                                                                                                                                                                                                                                                                                                                                                                                                                                                                              |
|--------|-----------------------------------|-----------|--------|--------|--------------------------------------------------------------------------------------------------------------------------------------------------------------------------------------------------------------------------------------------------------------------------------------------------------------------------------------------------------------------------------------------------------------------------------------------------------------------------------------------------------------------------------------------------------------------------------------------------------------|
| MYC    | transcription regulator           | Inhibited | −2.343 | 1E-10  | DRBS1, KRT10, KRT8, LDHA, MDH2, PKM, PRDX5, RTF2, SCFD1, SERPINA1, TEX10, TF, TXN, AFP, ALB, ALDOA, C, ANX, COL3A1, G6PD, GAPDH, GOT2, HSP90AA1, HSPA9, IDH2, KIF16B, LDHA, NCL, PKM, PRDX3, PRDX4, PREP, RPL13, RPL28, RPL4, RPLP2, RPS12, SERPINA1, SOD2, TF, TXN, AFP, AHSG, AKR1C1/ AKR1C2, ALB, COL3A1, HSPA5, SERPINA1, HSPA9, MARCKSL1, PFN1, PRDX1, ALDOA, G6PD, HSPA5, SERPINA1, TF, TTN, COMT, HSPA2, S100P, SERPINA1, SLC9A3R1, RSF7, AKR1C1/ AKR1C2, COL3A1, GAPDH, H2AX, HSPA5, LDHA, PKM, TF, TRPV1, LDHA, MDH2, PFN1, PKM, PRDX5, SERPINA1, SND1, ALDOA, G6PD, GAPDH, IDH2, LDHA, PKM, TALDO1 |
| HNF1A  | transcription regulator           |           | −1.981 | 0.0142 |                                                                                                                                                                                                                                                                                                                                                                                                                                                                                                                                                                                                              |
| Ige    | complex                           |           | −1.98  | 0.0947 |                                                                                                                                                                                                                                                                                                                                                                                                                                                                                                                                                                                                              |
| SREBF1 | transcription regulator           |           | −1.969 | 0.0021 |                                                                                                                                                                                                                                                                                                                                                                                                                                                                                                                                                                                                              |
| PGR    | ligand-dependent nuclear receptor |           | −1.969 | 0.0037 |                                                                                                                                                                                                                                                                                                                                                                                                                                                                                                                                                                                                              |
| IGF1   | growth factor                     |           | −1.813 | 0.001  |                                                                                                                                                                                                                                                                                                                                                                                                                                                                                                                                                                                                              |
| MTOR   | kinase                            |           | −1.725 | 0.0027 |                                                                                                                                                                                                                                                                                                                                                                                                                                                                                                                                                                                                              |
| PCGEM1 | other                             |           | −1.704 | 2E-09  |                                                                                                                                                                                                                                                                                                                                                                                                                                                                                                                                                                                                              |

© 2000-2020 QIAGEN. All rights reserved.

**Table S2.** Patient clinicopathological characteristics, tumor characteristics, and treatment characteristics for HCV+ HCC patients (N = 90).

| Factor                      | Median (Range) | N                 | Percentage |
|-----------------------------|----------------|-------------------|------------|
| <b>Patient Demographics</b> |                |                   |            |
| Gender                      | Male           | 62                | 69         |
|                             | Female         | 28                | 31         |
| Cirrhosis stage             | 1              | 22                | 24         |
|                             | 2              | 19                | 21         |
|                             | 3              | 17                | 19         |
|                             | 4              | 32                | 36         |
| Age (y)                     | >70            | 74.04 (71–84)     | 24         |
|                             | ≤70            | 63.83 (45–70)     | 86         |
| BMI                         | 15–24          | 21.00 (15.7–24.7) | 83         |
|                             | >25            | 26.80 (25.2–28.8) | 17         |
| Recurrence                  | Positive       | 54                | 60         |
|                             | Negative       | 36                | 40         |

|                                  |          |                   |    |    |
|----------------------------------|----------|-------------------|----|----|
| Stage                            | I        |                   | 25 | 28 |
|                                  | II       |                   | 41 | 45 |
|                                  | III      |                   | 21 | 24 |
|                                  | IV       |                   | 3  | 3  |
| <b>Tumor characteristics</b>     |          |                   |    |    |
| Differentiation                  | Well     |                   | 8  | 9  |
|                                  | Moderate |                   | 35 | 39 |
|                                  | Poor     |                   | 47 | 52 |
| Venous invasion                  | Positive |                   | 25 | 28 |
|                                  | Negative |                   | 65 | 72 |
| Depth of tumor invasion          | T1       |                   | 25 | 28 |
|                                  | T2       |                   | 42 | 47 |
|                                  | T3       |                   | 20 | 22 |
|                                  | T4       |                   | 3  | 3  |
| Distant metastasis               | Positive |                   | 1  | 99 |
|                                  | Negative |                   | 89 | 1  |
| Tumor size (cm <sup>3</sup> )    | ≤2       | 0.7 (0.03–1.95)   | 55 | 61 |
|                                  | >2       | 13.5 (2.02–70.31) | 35 | 39 |
| Formation of capsule             | Present  |                   | 67 | 74 |
|                                  | Absent   |                   | 23 | 26 |
| Infiltration to capsule          | Positive |                   | 54 | 60 |
|                                  | Negative |                   | 36 | 40 |
| <b>Treatment characteristics</b> |          |                   |    |    |
| Neoadjuvant therapy              | Yes      |                   | 26 | 29 |
|                                  | No       |                   | 64 | 71 |
| Radiation therapy                | Yes      |                   | 14 | 16 |
|                                  | No       |                   | 76 | 84 |
| Surgical resection               | Lobe     |                   | 9  | 10 |
|                                  | Wedge    |                   | 81 | 90 |

Tumor volume was counted as  $\text{length}/2 * (\text{width}/2) * (\text{width}/2)$  and expressed in cm<sup>3</sup>.
